# Supplementary material for: Efficacy of daclizumab beta versus intramuscular interferon beta-1a on disability progression across patient demographic and disease activity subgroups in DECIDE
Source: PubMed Central journal article supplement — Mult Scler. 2017 Oct 6;24(14):1883–91. doi: 10.1177/1352458517735190 (PMC6282160; doi:10.1177/1352458517735190), 2017-10-06
Supplement: MSJ735190_supplementary_figure.pdf [file MSJ735190_supplementary_figure.pdf]

**Figure S1.** Forest plot for 24-week sustained MSFCS composite progression for daclizumab beta versus IM IFN beta-1a by baseline demographics and disease characteristics using alternate definitions for 9HPT.

**(A) MSFCS (9HPT using dominant hand only)**

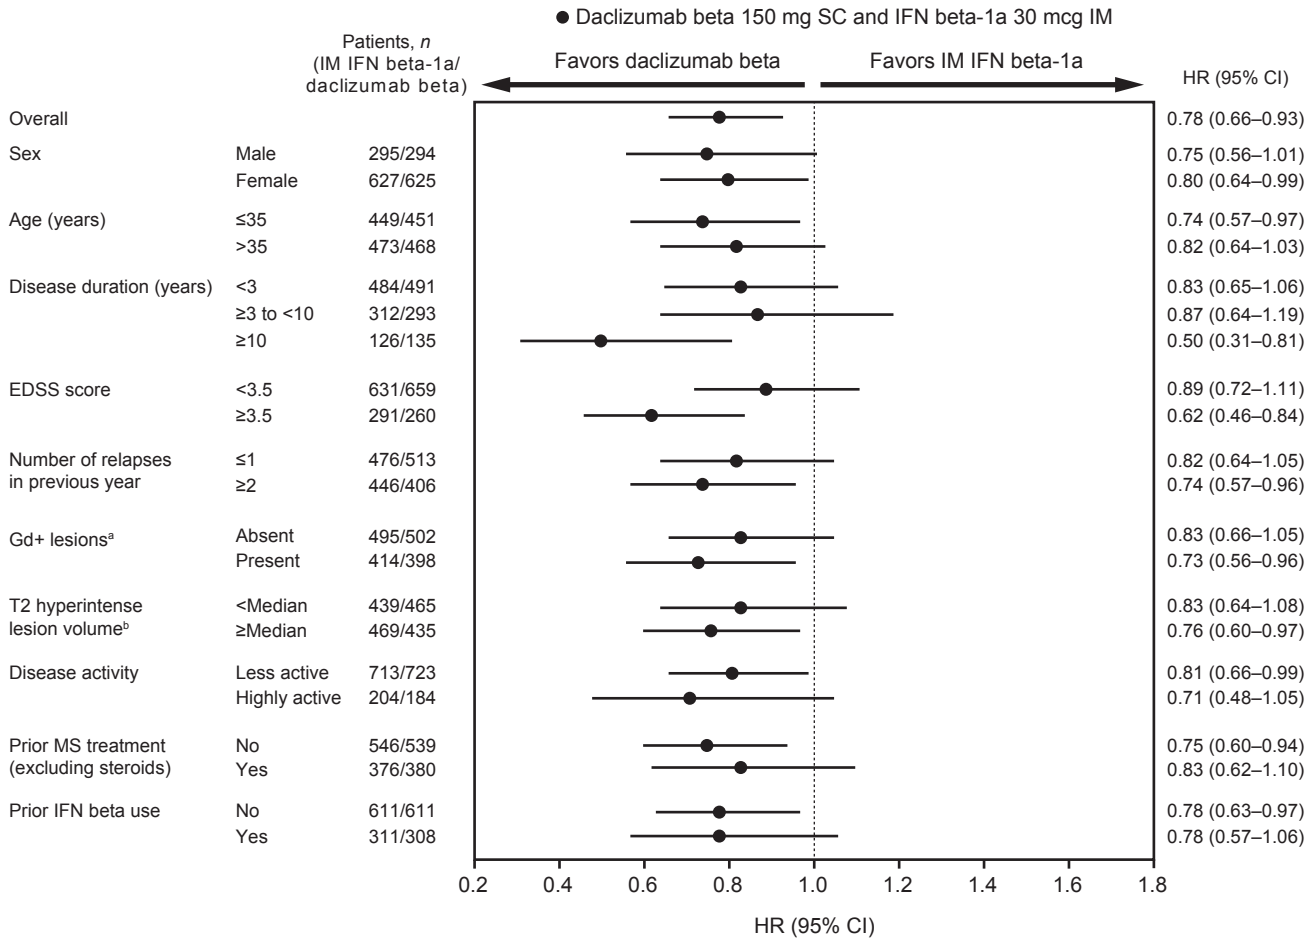

**(B) MSFCS (9HPT using both dominant and non-dominant hands)**

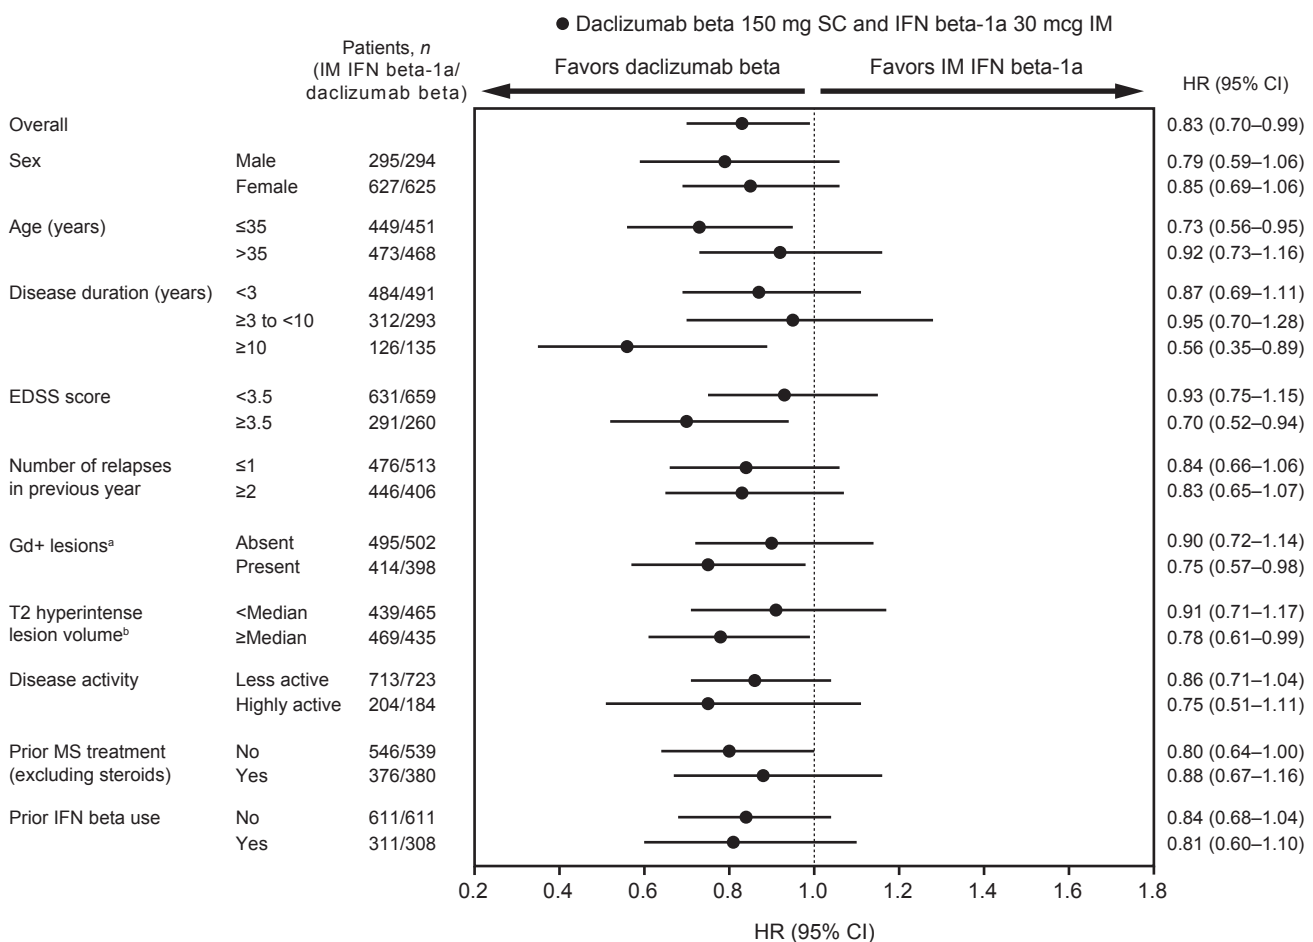

9HPT: 9-Hole Peg Test; CI: confidence interval; EDSS: Expanded Disability Status Scale; Gd+: gadolinium-enhancing; HR: hazard ratio; IFN, interferon; IM: intramuscular; MS: multiple sclerosis; MSFCS: modified Multiple Sclerosis Functional Composite; SC: subcutaneous.
